# Supplementary material for: lncRNA DLEU2 modulates cell proliferation and invasion of non-small cell lung cancer by regulating miR-30c-5p/SOX9 axis
Source: publisher site journal article supplement (doi:10.18632/aging.102226), 2019-09-20
Supplement: Supplementary file [file aging-v11i18-102226-supplementary-material-SD1.pdf]

SUPPLEMENTARY FIGURES

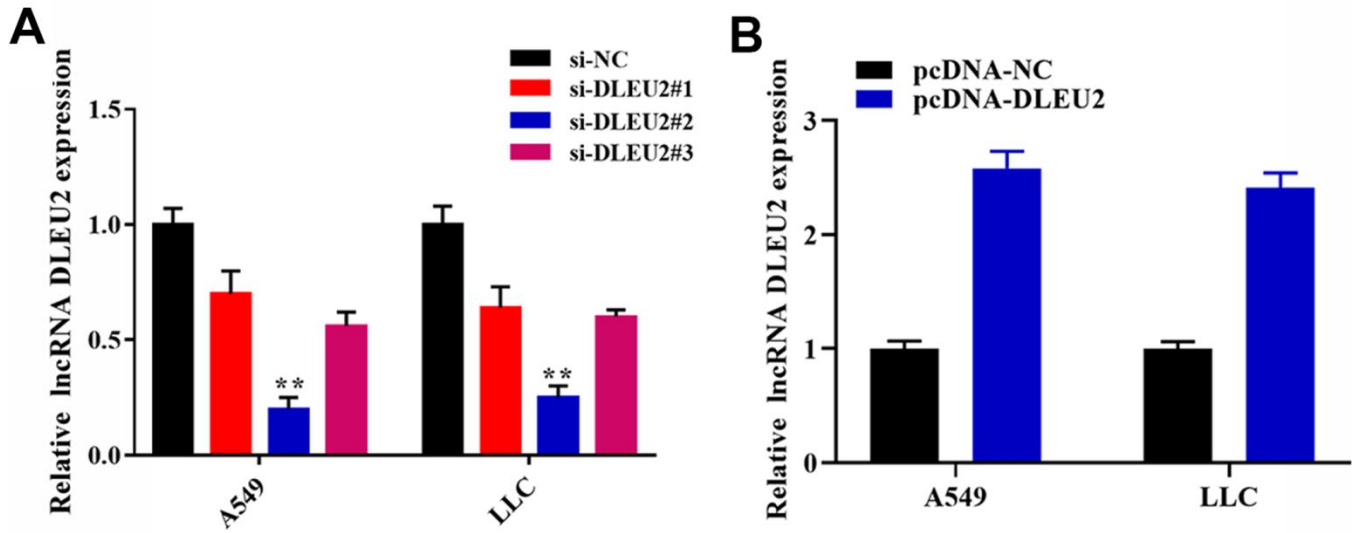

Supplementary Figure 1. Expression of IncRNA DLEU2 in A549 and LLC cells were measured by qRT-PCR.

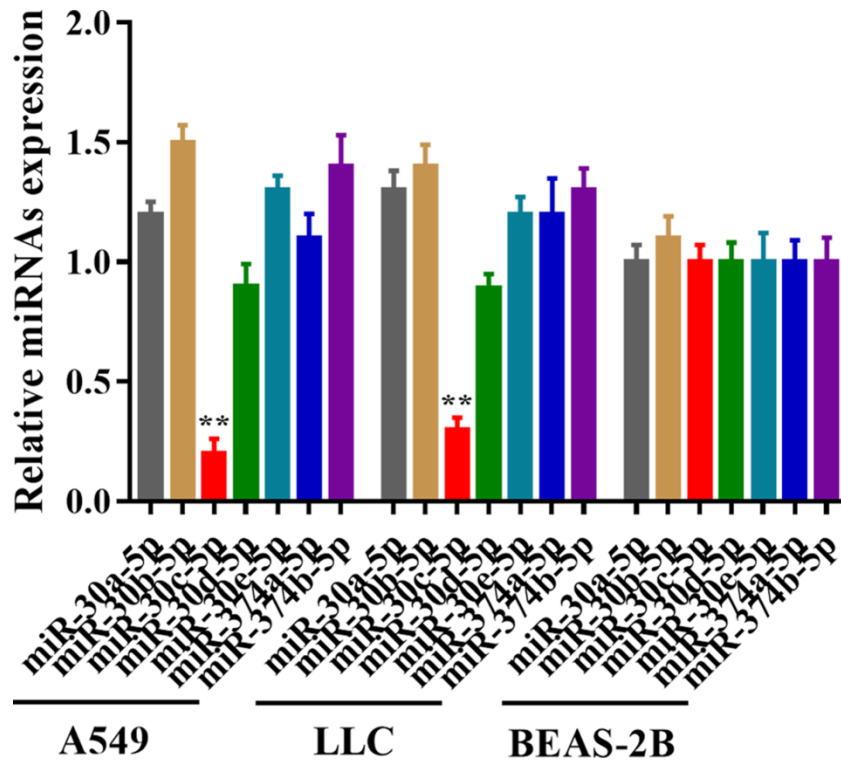

Supplementary Figure 2. Expression of miRNAs in NSCLC tissues was detected by qRT-PCR.

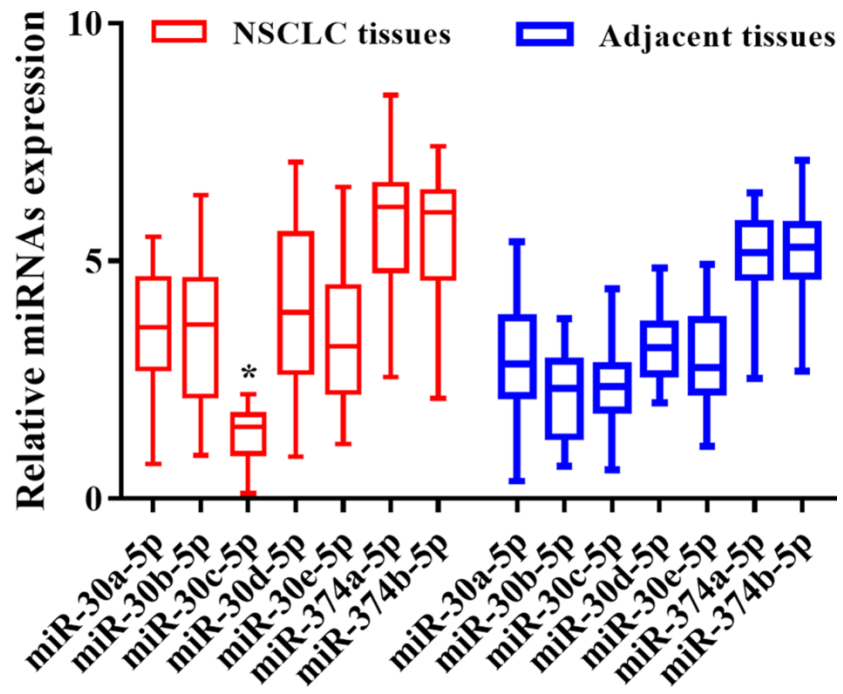

Supplementary Figure 3. Expression of miRNA in A549 and LLC cells were detected by qRT-PCR.
